# Supplementary material for: Whole-Genome Association Mapping and Genomic Prediction for Iron Concentration in Wheat Grains
Source: MDPI journal article supplement (doi:10.3390/ijms20010076), 2018-12-25
Supplement: s1 [file s1]

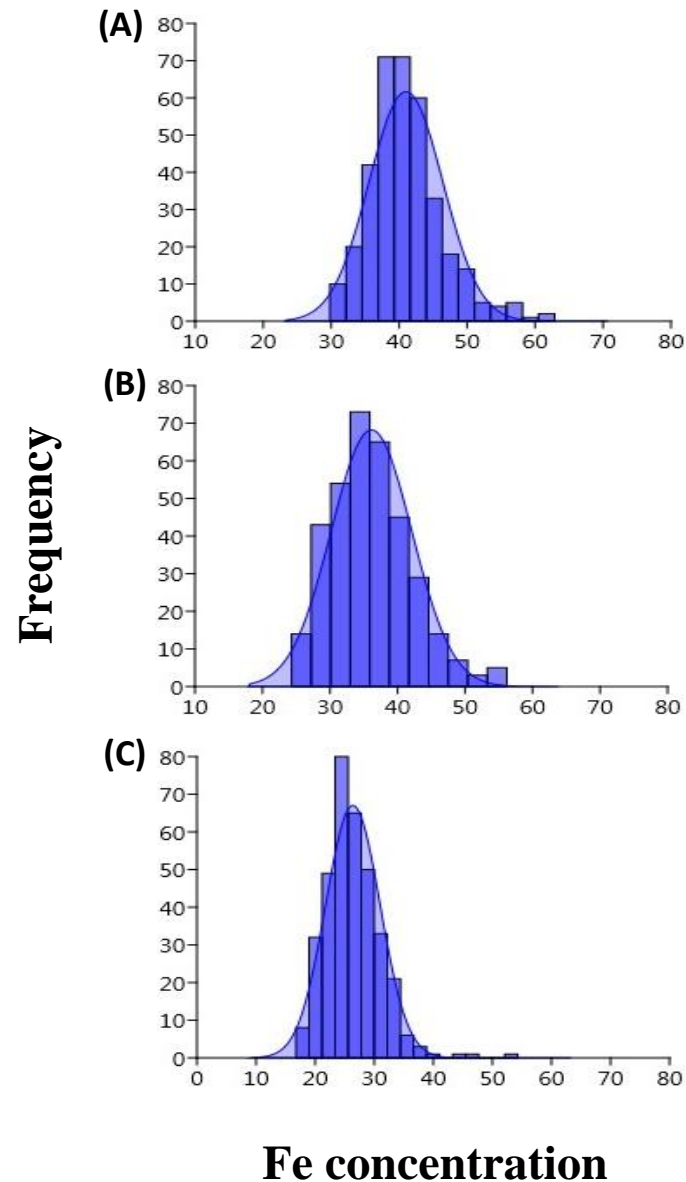

**Figure (S2):** The phenotypic distribution of Fe concentrations ( $\mu\text{g g}^{-1}$  dry weight (DW)) in the individual season (2015,2016 and 2017).
