# Supplementary material for: Whole-Genome Association Mapping and Genomic Prediction for Iron Concentration in Wheat Grains
Source: MDPI journal article supplement (doi:10.3390/ijms20010076), 2018-12-25
Supplement: s1 [file s1]

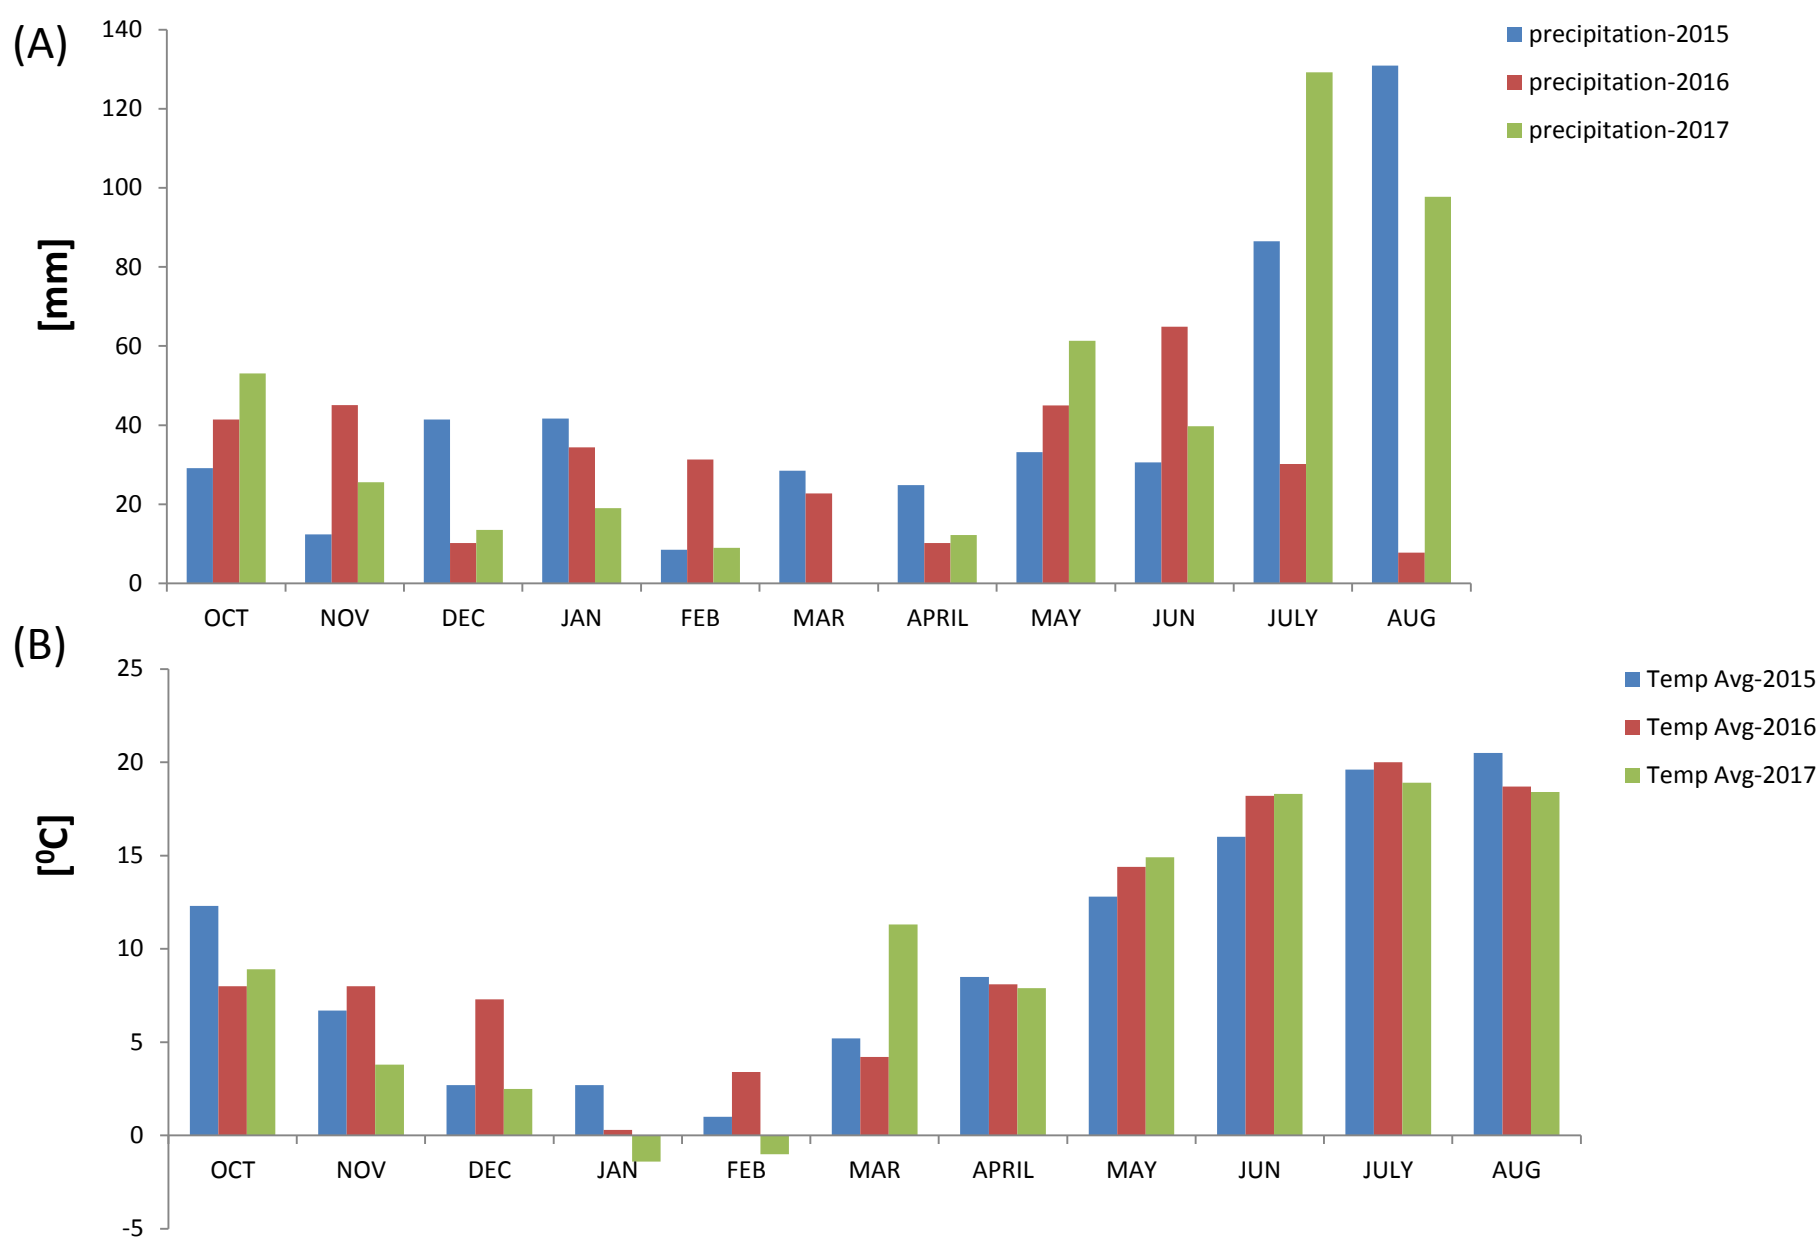

**Figure S3: (A)** precipitation monthly average (mm) during winter wheat growing (October- August) among three years(2014/2015, 2015/2016, and 2016/2017). **(B)** Temperature monthly average (°C) during winter wheat growing (October- August) among three years(2014/2015, 2015/2016, and 2016/2017).
