# Supplementary material for: Whole-Genome Association Mapping and Genomic Prediction for Iron Concentration in Wheat Grains
Source: MDPI journal article supplement (doi:10.3390/ijms20010076), 2018-12-25
Supplement: s1 [file s1]

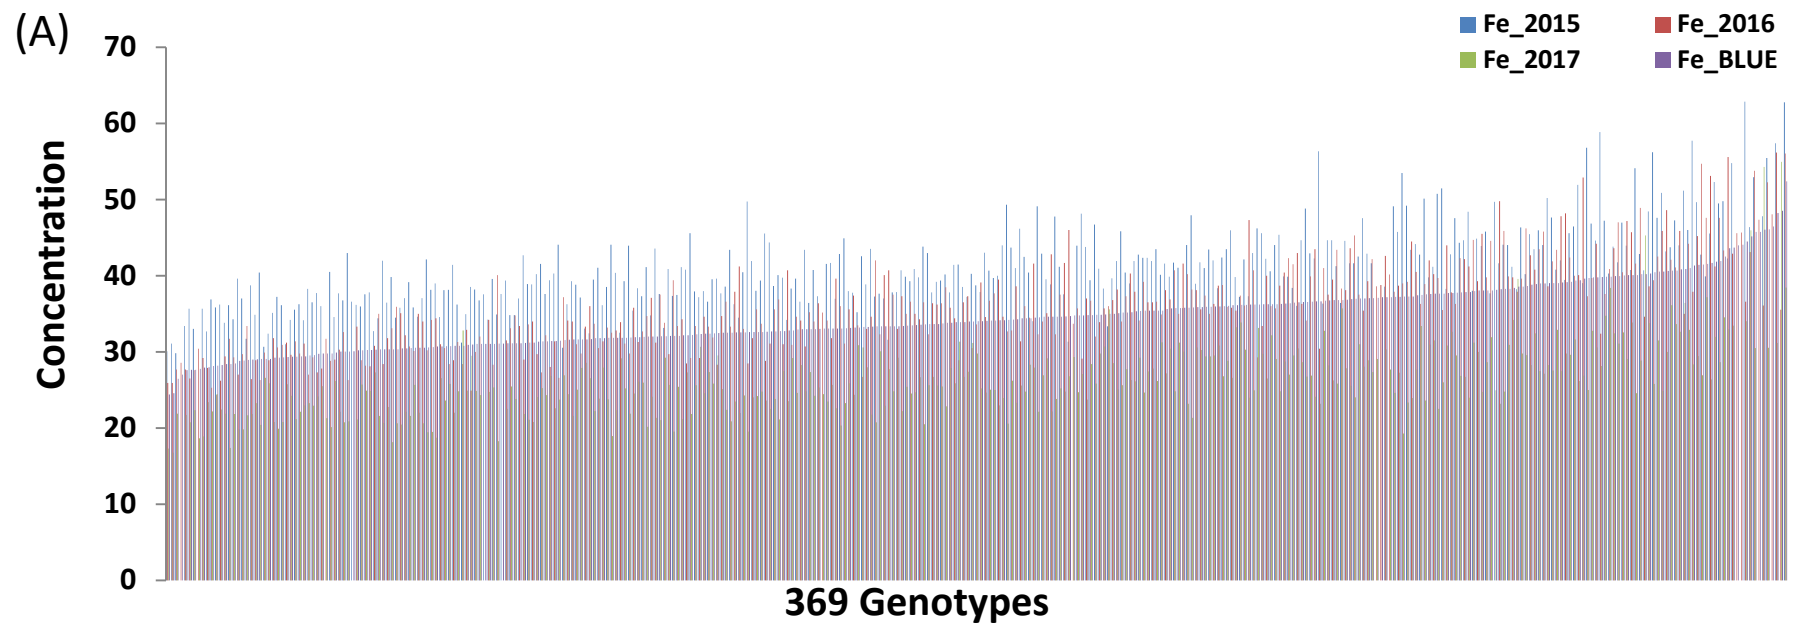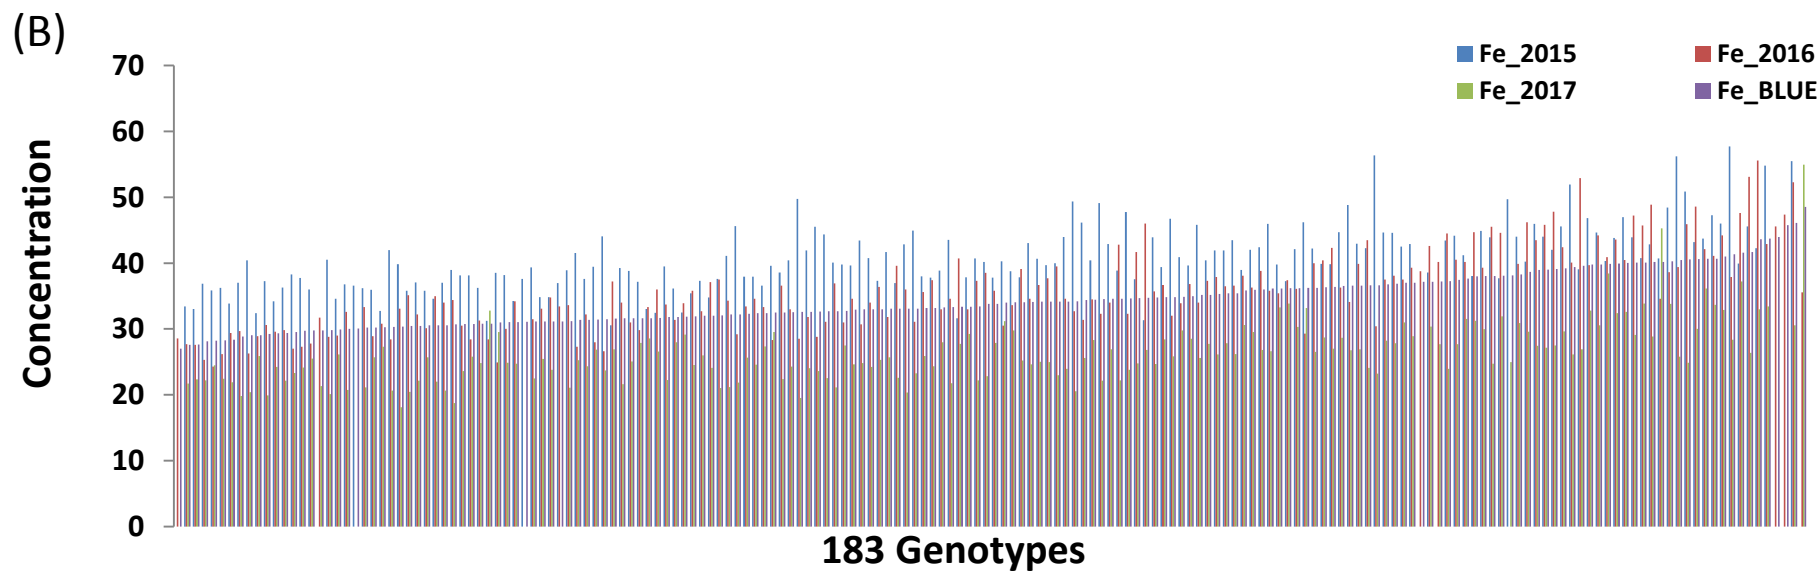

**Figure S1. (A)** Fe concentration ( $\mu\text{g g}^{-1}$  dry weight (DW)) distribution of the complete wheat genotypes panel (369) in the three years (2015/2016/2017) and BLUE. **(B)** Fe concentration ( $\mu\text{g g}^{-1}$  DW) distribution of the subpanel of wheat genotypes (183) in the three years (2015/2016/2017) and BLUE.
