# Supplementary figures and images for: Whole-Genome Association Mapping and Genomic Prediction for Iron Concentration in Wheat Grains
Source: MDPI journal article supplement (doi:10.3390/ijms20010076), 2018-12-25

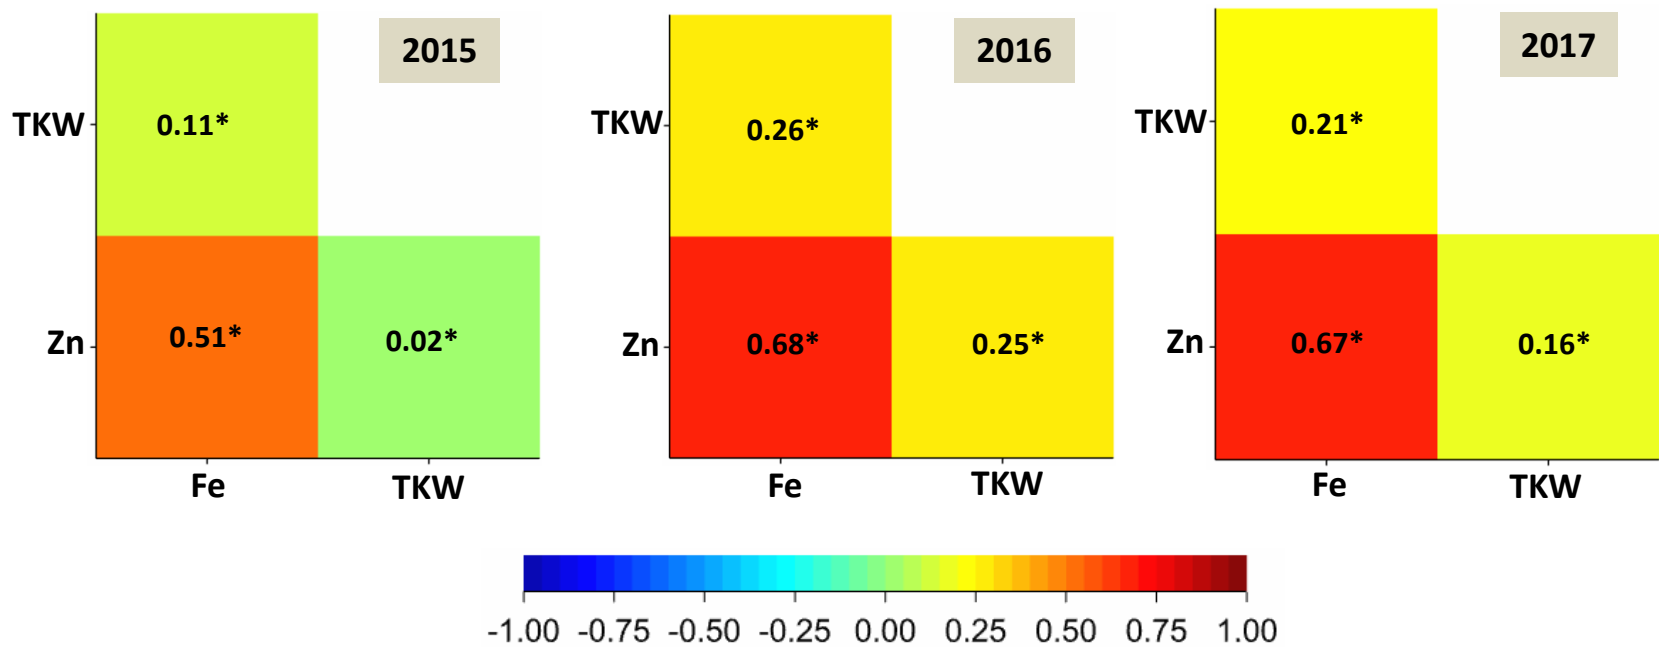

**Figure S4:** Person correlation between Fe, Zn and TKW among three years (2015, 2016 and 2017), \*P<0.001.

Supplement: s1 [file s1]
